# Supplementary material
Source: MDPI journal article supplement (https://www.mdpi.com/2227-9717/11/2/603)

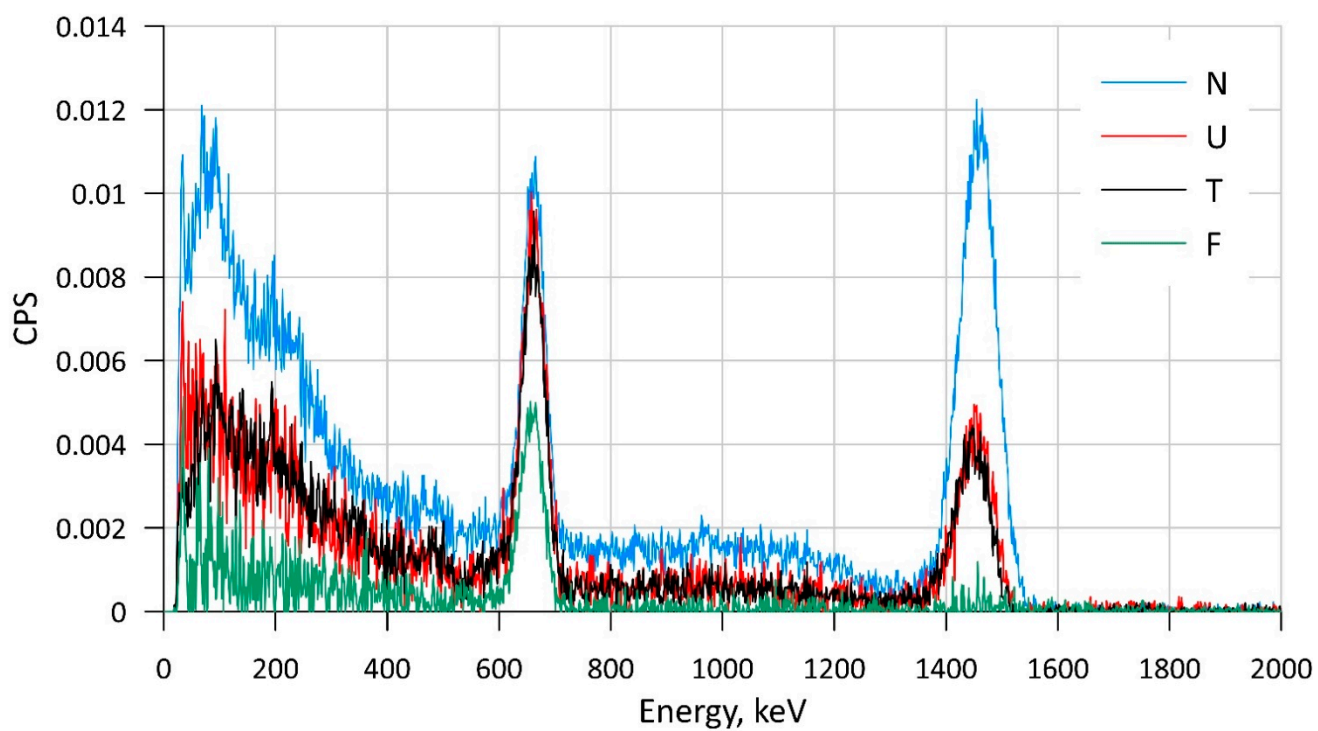

N—Niket; U—Uniket; T—Termoxid 35; F—FIC

**Figure S1.** Spectra of sorbents after cesium recovery

Supplement: s1 [file s1]
